# Supplementary material for: Kinetics of hypochlorous acid reactions with organic and chloride-containing tropospheric aerosol
Source: Royal Society of Chemistry journal article supplement (doi:10.1039/d3em00292f), 2023-01-01
Supplement: d3em00292f1.pdf [file d3em00292f1.pdf]

Supplementary Information for

## Kinetics of hypochlorous acid reactions with organic and chloride-containing tropospheric aerosol

Spiro D. Jorga<sup>1\*</sup>, Tengyu Liu<sup>2</sup>, Yutong Wang<sup>1</sup>, Sumaiya Hassan<sup>1</sup>,

Han Huynh<sup>1,#</sup> and Jonathan P. D. Abbatt<sup>1\*</sup>

<sup>1</sup>Department of Chemistry, University of Toronto, Toronto, M5S 3H6, ON, Canada

<sup>2</sup>Joint International Research Laboratory of Atmospheric and Earth System Sciences, School of Atmospheric Sciences, Nanjing University, Nanjing, 210023, China

<sup>#</sup>now at: Cooperative Institute for Research in Environmental Sciences, University of Colorado, Boulder, Colorado 80309, USA

\*Email: [spiro.jorga@utoronto.ca](mailto:spiro.jorga@utoronto.ca), [jonathan.abbatt@utoronto.ca](mailto:jonathan.abbatt@utoronto.ca)

**Table S1:** Experimental conditions for the chloride-containing aerosol and HOCl experiments.

| Exp # | RH (%) | Temperature (°C) | HOCl (ppb) | Cl <sup>-</sup> (M) | Malonic acid (M) | Aerosol pH | Ionic Strength (M) | $k_{\text{HOCl} + \text{H}^+ + \text{Cl}^-}$ (M <sup>-2</sup> s <sup>-1</sup> ) |
|-------|--------|------------------|------------|---------------------|------------------|------------|--------------------|---------------------------------------------------------------------------------|
| 1     | 70     | 20               | 600        | 2.2                 | 2.9              | 3.6        | 8.0                | $5.3 \times 10^4$                                                               |
| 2     | 83     | 20               | 600        | 1.5                 | 1.8              | 3.1        | 4.2                | $1.8 \times 10^4$                                                               |
| 3     | 78     | 25               | 600        | 1.8                 | 2.7              | 3.2        | 5.3                | $3.4 \times 10^4$                                                               |
| 4     | 83     | 21               | 600        | 1.5                 | 1.8              | 3.1        | 4.1                | $1.1 \times 10^4$                                                               |
| 5     | 63     | 22               | 600        | 2.5                 | 3.5              | 3.8        | 10.5               | $1.7 \times 10^5$                                                               |
| 6     | 63     | 22               | 600        | 2.4                 | 4.2              | 3.7        | 9.6                | $2.7 \times 10^5$                                                               |
| 7     | 63     | 22               | 600        | 2.4                 | 4.2              | 3.7        | 9.6                | $2.2 \times 10^5$                                                               |
| 8     | 61     | 21               | 600        | 2.5                 | 4.3              | 3.7        | 10.3               | $1.9 \times 10^5$                                                               |
| 9     | 61     | 21               | 600        | 2.5                 | 4.3              | 3.7        | 10.3               | $2.5 \times 10^5$                                                               |
| 10    | 61     | 23               | 600        | 2.5                 | 4.4              | 3.7        | 10.3               | $2.4 \times 10^5$                                                               |
| 11    | 65     | 21.5             | 600        | 2.4                 | 3.6              | 3.7        | 9.5                | $3.4 \times 10^5$                                                               |
| 12    | 65     | 21.5             | 600        | 2.4                 | 3.6              | 3.7        | 9.5                | $2.8 \times 10^5$                                                               |
| 13    | 65     | 21.5             | 600        | 2.4                 | 3.6              | 3.7        | 9.5                | $2.6 \times 10^5$                                                               |
| 14    | 62     | 21               | 600        | 2.5                 | 3.8              | 3.8        | 10.5               | $1.9 \times 10^5$                                                               |
| 15    | 62     | 21               | 600        | 2.5                 | 3.8              | 3.8        | 10.5               | $3.2 \times 10^5$                                                               |
| 16    | 80     | 22               | 600        | 1.5                 | 3.1              | 2.9        | 4.3                | $5.9 \times 10^3$                                                               |
| 17    | 80     | 22               | 1200       | 1.5                 | 3.1              | 2.9        | 4.3                | $1.9 \times 10^4$                                                               |
| 18    | 83     | 21               | 600        | 1.5                 | 2.3              | 3.0        | 5.2                | $7.5 \times 10^4$                                                               |
| 19    | 83     | 21               | 600        | 1.5                 | 2.3              | 3.0        | 5.2                | $1.0 \times 10^4$                                                               |
| 20    | 81     | 22               | 600        | 1.6                 | 2.1              | 3.1        | 6.1                | $1.2 \times 10^4$                                                               |
| 21    | 81     | 22               | 600        | 1.6                 | 2.1              | 3.1        | 6.1                | $1.5 \times 10^4$                                                               |
| 22    | 81     | 22               | 1200       | 1.6                 | 2.1              | 3.1        | 6.1                | $2.9 \times 10^4$                                                               |
| 23    | 78     | 21.5             | 1200       | 1.8                 | 2.4              | 3.3        | 5.7                | $5.9 \times 10^4$                                                               |
| 24    | 78     | 21.5             | 1200       | 1.8                 | 2.4              | 3.3        | 5.7                | $6.2 \times 10^4$                                                               |

**Table S2:** Experimental conditions for the organic aerosol and HOCl experiments.

| Exp # | Aerosol type          | RH (%) | Temperature (°C) | HOCl (ppm) | Solution pH |
|-------|-----------------------|--------|------------------|------------|-------------|
| 1     | Coniferaldehyde       | 70     | 23               | 2.4        | 5.4         |
| 2     | Coniferaldehyde       | 70     | 23               | 2.4        | 5.4         |
| 3     | Coniferaldehyde       | 71     | 22               | 2.4        | 5.4         |
| 4     | Coniferaldehyde       | 71     | 22               | 2.4        | 5.4         |
| 5     | Coniferaldehyde       | 68     | 23               | 2.4        | 5.7         |
| 6     | Coniferaldehyde       | 69     | 22               | 2.4        | 5.7         |
| 7     | Furfural              | 71     | 22               | 2.4        | 4.1         |
| 8     | Furfural              | 71     | 22               | 2.4        | 4.1         |
| 9     | Furfural              | 66     | 23               | 2.4        | 4.1         |
| 10    | Furfural              | 66     | 23               | 2.4        | 4.1         |
| 11    | Salicylic acid        | 70     | 22.5             | 2.4        | 3.4         |
| 12    | Salicylic acid        | 70     | 22               | 2.4        | 3.4         |
| 13    | Salicylic acid        | 67     | 23               | 2.4        | 3.4         |
| 14    | Salicylic acid        | 67     | 23               | 2.4        | 3.4         |
| 15    | Furfural/buffer       | 75     | 21.5             | 2.4        | 3.9         |
| 16    | Furfural/buffer       | 75     | 21               | 2.4        | 3.9         |
| 17    | Furfural/buffer       | 75     | 21               | 2.4        | 3.9         |
| 18    | Furfural/buffer       | 65     | 22               | 2.4        | 4           |
| 19    | Furfural/buffer       | 68     | 22.5             | 2.4        | 4           |
| 20    | Furfural/buffer       | 67     | 22               | 2.4        | 4           |
| 21    | Furfural/buffer/NH4Cl | 69     | 22.5             | 2.4        | 3.8         |
| 22    | Furfural/buffer/NH4Cl | 69     | 22               | 2.4        | 3.8         |
| 23    | Furfural/buffer/NH4Cl | 68     | 22.5             | 2.4        | 3.8         |
| 24    | Furfural/buffer/NH4Cl | 69     | 22               | 2.4        | 3.8         |
| 25    | Furfural/buffer/NH4Cl | 76     | 22               | 2.4        | 3.9         |
| 26    | Furfural/buffer/NH4Cl | 75     | 21               | 2.4        | 3.9         |
| 27    | Furfural/buffer/NH4Cl | 76     | 22               | 2.4        | 3.9         |
| 28    | Furfural/buffer/NH4Cl | 63     | 22               | 2.4        | 3.9         |
| 29    | Biomass/buffer        | 62     | 22               | 2.4        | 4           |
| 30    | Biomass/buffer        | 62     | 22               | 2.4        | 4           |
| 31    | Biomass/buffer        | 63     | 21               | 2.4        | 4           |
| 32    | Biomass/buffer        | 64     | 21.5             | 2.4        | 3.9         |
| 33    | Biomass/buffer        | 64     | 22               | 2.4        | 3.9         |
| 34    | Biomass/buffer/NH4Cl  | 64     | 21.8             | 2.4        | 4           |
| 35    | Biomass/buffer/NH4Cl  | 64     | 22               | 2.4        | 4           |
| 36    | Biomass/buffer/NH4Cl  | 64     | 22               | 2.4        | 4           |
| 37    | Biomass/buffer/NH4Cl  | 64     | 22               | 2.4        | 4           |

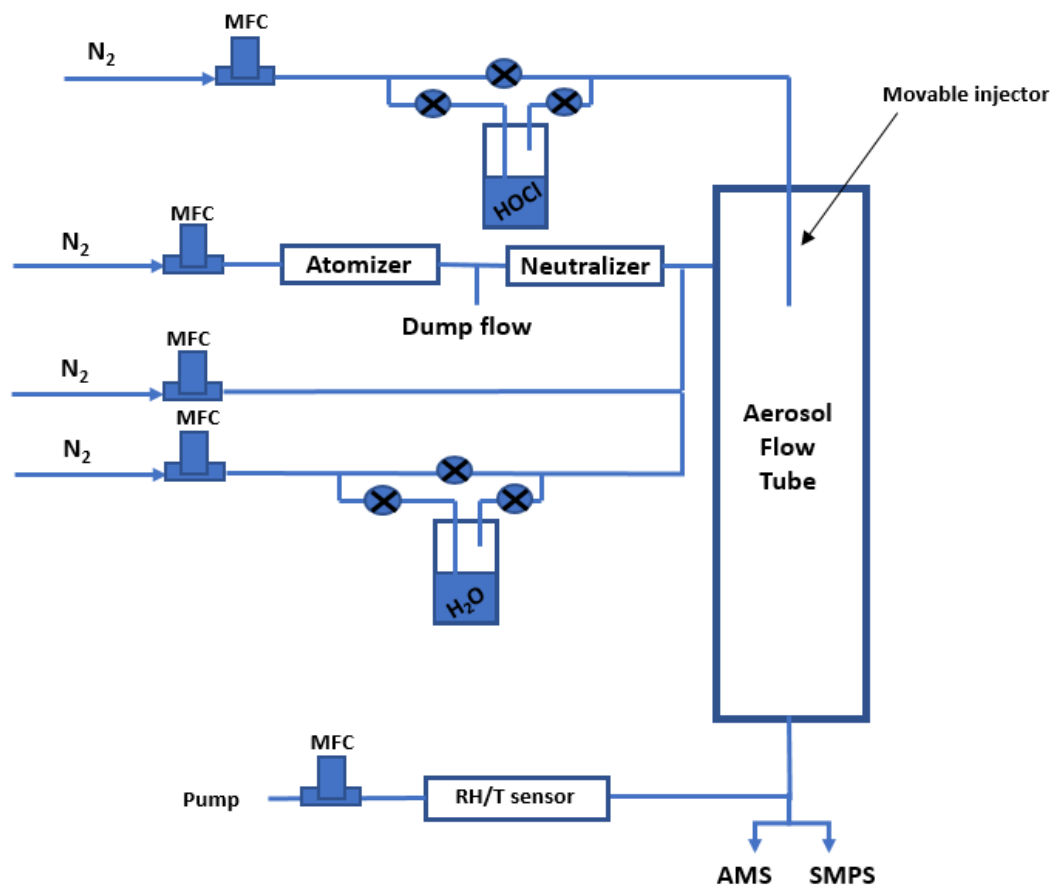

**Figure S1:** Schematic of the experimental set-up.

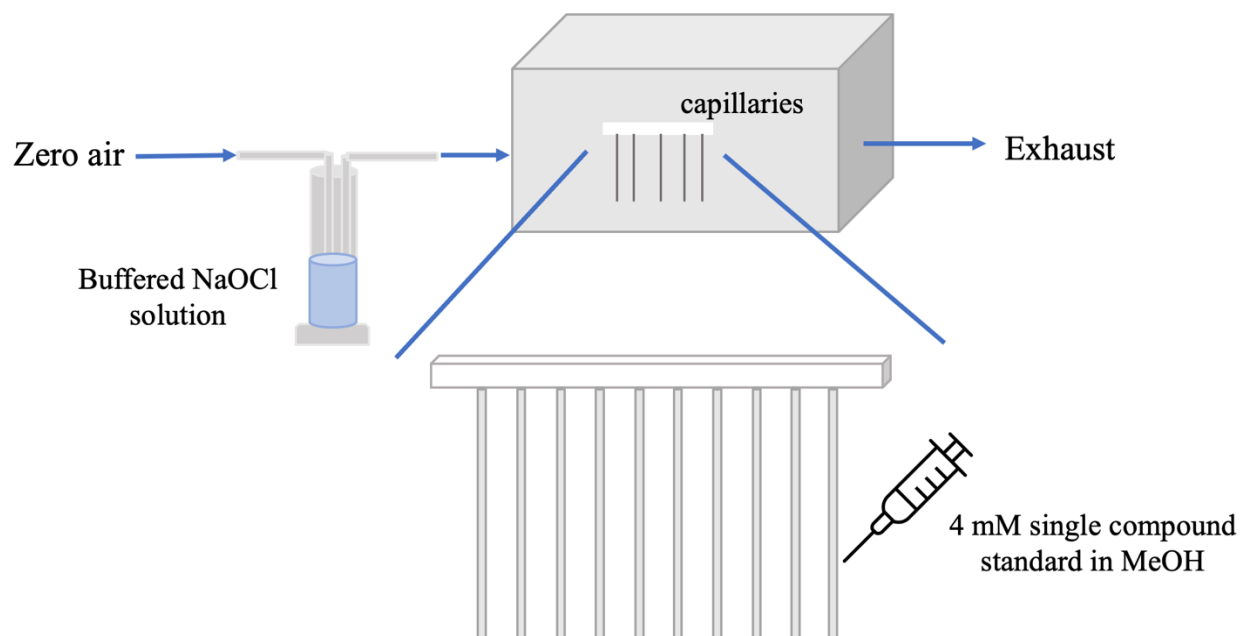

**Figure S2:** Experimental set-up for coniferaldehyde/salicylic acid HOCl exposure experiment.

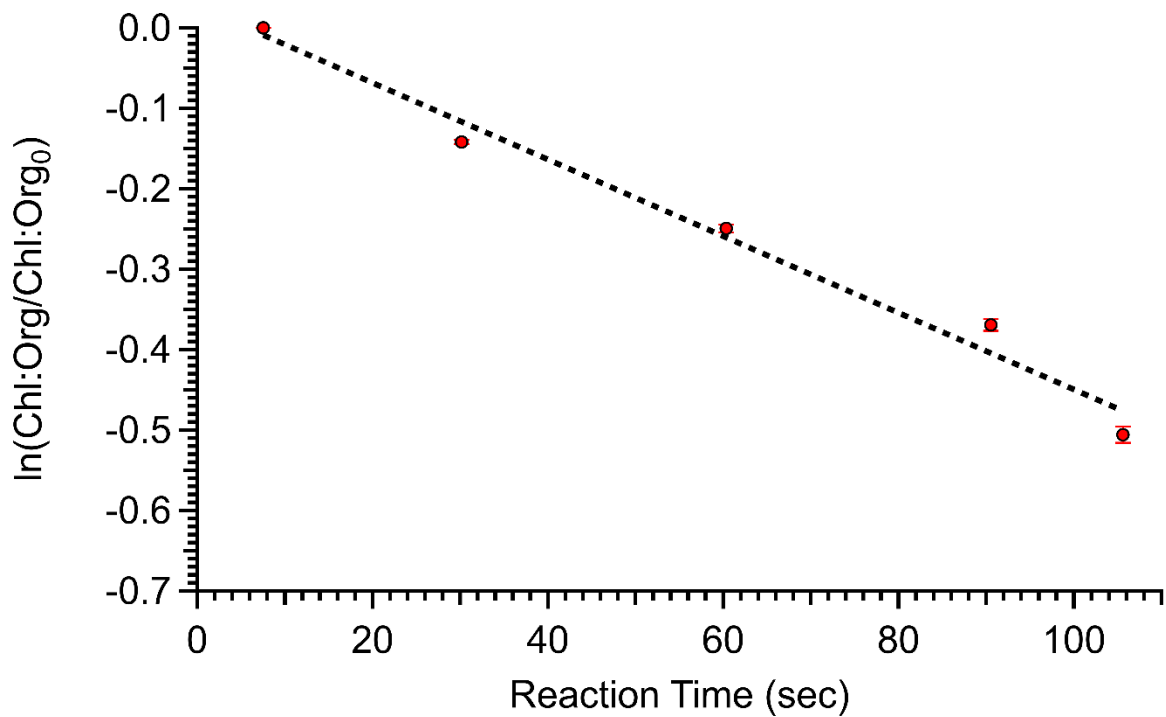

**Figure S3:** First order decay of  $\ln(\text{Chl:Org})$  normalized to the ratio at the start of the experiment versus the reaction time in the flow tube. The results are referring to the HOCl and chloride experiment described in the main text (see Figure 1). The error bars represent one standard deviation and the dotted line the best fit of the slope.

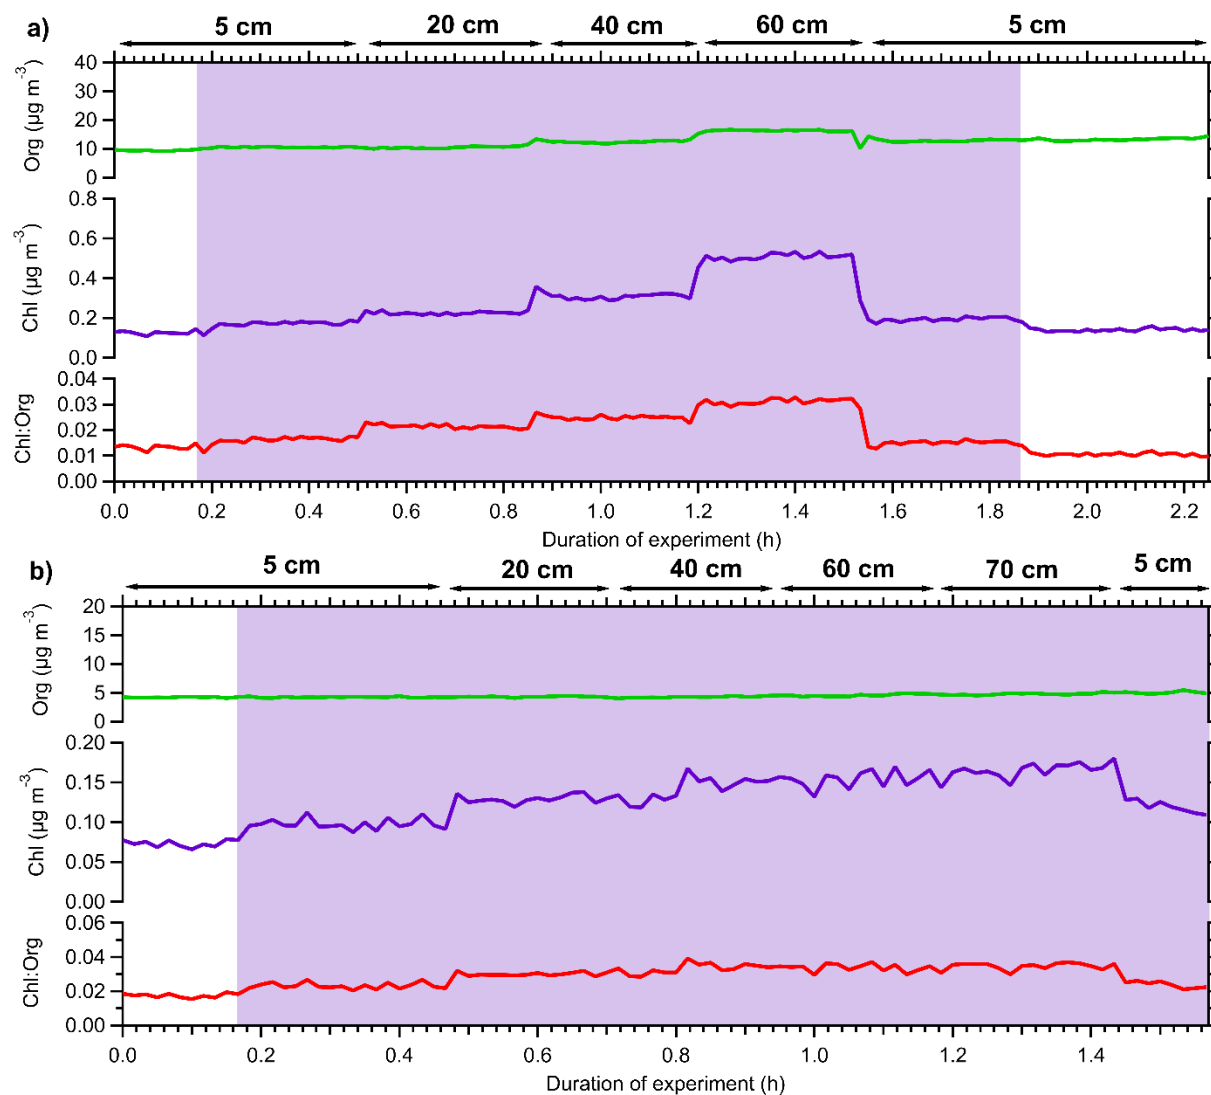

**Figure S4:** Time series of organic mass loading, chloride mass loading and Chl:Org ratio for a) coniferaldehyde and b) salicylic acid aerosol particles as exposed to HOCl (purple shaded area). Injector position in the flow tube is shown on the upper horizontal axis.

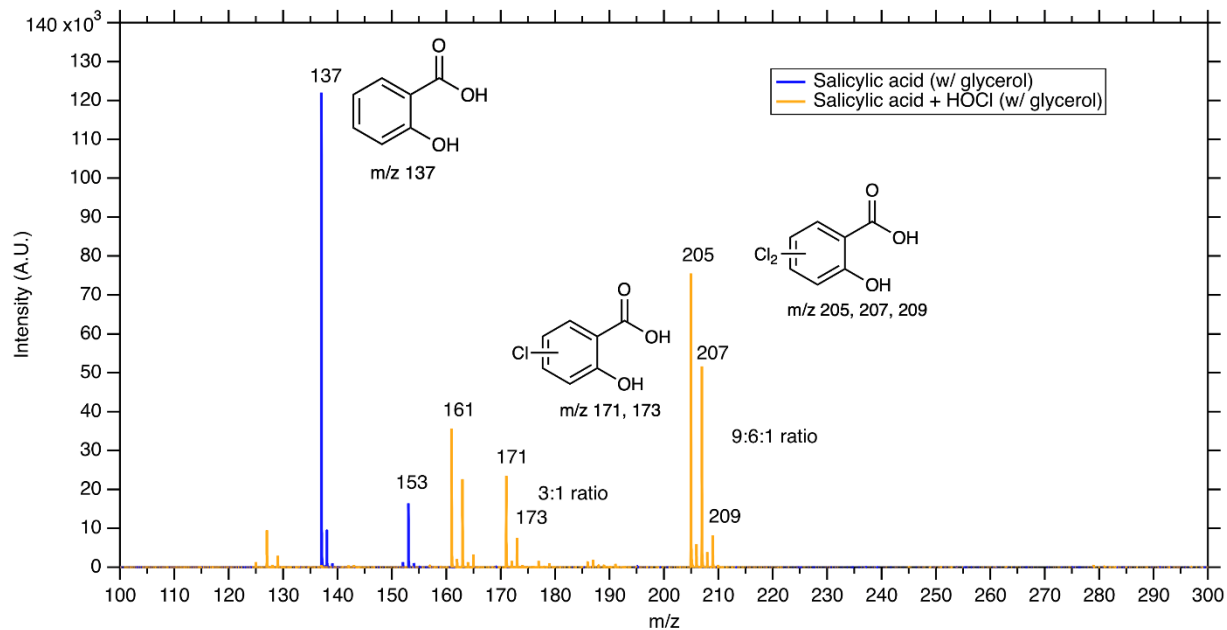

**Figure S5:** DART mass spectra (negative ion mode) of the glycerol-spiked salicylic acid before (blue) and after (orange) HOCl gaseous exposure. Chemical structures responsible for the corresponding mass peaks are shown along with the  $m/z$  of the observed ion and the approximate intensity ratio of clusters of peaks.
